1  
2  
3  
4  
5 **ContamLD: Estimation of Ancient**  
6 **Nuclear DNA Contamination Using**  
7 **Breakdown of Linkage**  
8 **Disequilibrium**  
9

10  
11 Nathan Nakatsuka<sup>1,2,3,\*†</sup>, Éadaoin Harney<sup>1,3,4,\*†</sup>, Swapan Mallick<sup>1,3</sup>, Matthew Mah<sup>1,3</sup>,  
12 Nick Patterson<sup>3</sup>, David Reich<sup>1,3,5,6,†</sup>  
13

14  
15  
16 <sup>1</sup>Department of Genetics, Harvard Medical School, New Research Building, 77 Ave.  
17 Louis Pasteur, Boston, MA 02115, USA

18 <sup>2</sup>Harvard-MIT Division of Health Sciences and Technology, Harvard Medical School,  
19 Boston, MA 02115, USA

20 <sup>3</sup>Department of Human Evolutionary Biology, Harvard University, 16 Divinity Ave.,  
21 Cambridge, MA 02138, USA

22 <sup>4</sup>Department of Organismic and Evolutionary Biology, Harvard University, 16 Divinity  
23 Ave., Cambridge, MA 02138, USA

24 <sup>5</sup>Broad Institute of Harvard and Massachusetts Institute of Technology, Cambridge, MA  
25 02141, USA

26 <sup>6</sup>Howard Hughes Medical Institute, Harvard Medical School, Boston, MA 02115, USA  
27

28 \*co-first authors  
29

30 <sup>†</sup>Corresponding authors: Nathan Nakatsuka ([nathan\\_nakatsuka@hms.harvard.edu](mailto:nathan_nakatsuka@hms.harvard.edu)),  
31 Éadaoin Harney ([harney@g.harvard.edu](mailto:harney@g.harvard.edu)), and David Reich  
32 ([reich@genetics.med.harvard.edu](mailto:reich@genetics.med.harvard.edu))  
33

34

35

## 36 **Abstract**

37  
38 Ancient DNA (aDNA) has emerged as a powerful technology for learning about history and  
39 biology, but unfortunately it is highly susceptible to contamination. Here we report a method  
40 called *ContamLD* for estimating autosomal aDNA contamination by measuring the breakdown of  
41 linkage disequilibrium in a sequenced individual due to the introduction of contaminant DNA,  
42 leveraging the idea that the contaminant should have haplotypes that are uncorrelated to those  
43 of the studied individual. Using simulated data, we confirm that *ContamLD* accurately infers  
44 contamination rates with low standard errors (e.g. less than 1.5% standard error in cases with  
45 <10% contamination and data from at least 500,000 sequences covering SNPs). This method is  
46 optimized for application to aDNA, leveraging characteristic aDNA damage patterns to provide  
47 calibrated contamination estimates. Availability: [https://github.com/nathan-](https://github.com/nathan-nakatsuka/ContamLD)  
48 [nakatsuka/ContamLD](https://github.com/nathan-nakatsuka/ContamLD).

## 50 **Keywords**

51  
52 Ancient DNA, linkage disequilibrium, contamination

53

54

## 55 **Background**

56  
57 Ancient DNA (aDNA) has emerged as a powerful technology for inferring population history,  
58 allowing direct study of the genomes of individuals who lived thousands of years in the past (1-  
59 3). Unfortunately, these inferences can be distorted by contamination during the excavation and  
60 storage of skeletal material, as well as the intensive processing required to extract the DNA and  
61 convert it into a form that can be sequenced.

62

63 Accurate measurement of the proportion of contamination in ancient DNA data is important,  
64 because it can provide guidance about whether analysis should be restricted to sequences that  
65 show the characteristic C-to-T damage pattern of authentic aDNA (if contamination is high) (4),  
66 or carried out at all. When analysis is restricted to focus only on damaged sequences, large  
67 fractions of authentic sequences are usually removed from the analysis dataset, as only a  
68 fraction of genuinely ancient sequences typically carry characteristic damage. In addition, if a  
69 sample is contaminated by another individual with damaged DNA—which can arise for example  
70 as a result of cross-contamination from other specimens handled in the same ancient DNA  
71 laboratory—it is impossible to distinguish authentic sequences from contaminating ones based  
72 on the presence or absence of characteristic ancient DNA damage.

73

74 Current methods for estimating contamination have significant limitations. Methods based on  
75 testing for heterogeneity in mitochondrial DNA sequences (which are expected to be  
76 homogeneous in an uncontaminated individual) can be biased, because there are several  
77 orders of magnitude of variation in the ratio of the mitochondrial to nuclear DNA copy number  
78 across samples. Thus, samples that have evidence of mitochondrial contamination can be  
79 nearly uncontaminated in their nuclear DNA, while samples that have no evidence of  
80 mitochondrial contamination can have high nuclear contamination (5). Another reliable method  
81 for estimating rates of contamination in ancient DNA leverages polymorphism on the X  
82 chromosome in males (*ANGSD*), but this method does not work in females (6-8).

83

84 Several methods for estimating contamination rates in present-day nuclear DNA have been  
85 published, including *ContEst* (9) and *ContaminationDetection* (10). However, these methods  
86 generally assume access to uncontaminated genotype data from the individual of interest or  
87 access to all possible contaminating individuals, which is rarely available for aDNA. Another

88 method developed specifically for aDNA, *DICE*, jointly estimates contamination rate and error  
89 rate along with demographic history based on allele frequency correlation patterns (11).  
90 However, this method requires both explicit demographic modeling and high genome coverage.  
91 While this may be effective for estimation of contamination in archaic genomes like  
92 Neanderthals and Denisovans that are highly genetically diverged from likely contaminant  
93 individuals, it is not optimized for study of contamination among closely related present-day  
94 human groups with complex demographic relationships or individuals from the same population.  
95 In Racimo *et al.* 2016 (11), *DICE* required over 3x genome sequence coverage and solved the  
96 distinctive problem of measuring contamination of present-day human in a Neanderthal  
97 genome.

98

99 We report a method for estimating autosomal aDNA contamination using patterns of linkage  
100 disequilibrium (LD) within a sample. This approach, called *ContamLD*, is based on the idea that  
101 when sequences from one or more contaminating individuals are present in a sample, LD  
102 among sequences derived from that sample is expected to be diminished, because the  
103 contaminant DNA derives from different haplotypes and therefore should have no LD with the  
104 authentic DNA of the ancient individual of interest. Thus, the goal of the algorithm is to  
105 determine the LD pattern the ancient individual would have had without contamination and  
106 compare it to the LD pattern found in the sample. The LD patterns of ancient individuals are  
107 determined using reference panels from 1000 Genomes Project populations to compute  
108 approximate background haplotype frequencies where haplotypes are defined as pairs of SNPs  
109 with high correlation to each other. Contamination is then estimated by fitting a maximum  
110 likelihood model of a mixture of haplotypes from an uncontaminated individual and a proportion  
111 of contamination (to be estimated from the data) from an unrelated individual. *ContamLD*  
112 corrects for mismatch of the ancestry of the ancient individual with the reference panels using  
113 two different user-specified options. In the first option, mismatch is corrected using estimates

114 from damaged sequences (which, in principle, lack present-day contaminants). In the second  
115 option, *ContamLD* performs an “external” correction by subtracting the sample’s contamination  
116 estimate from estimates for individuals of the same population believed to have negligible  
117 contamination (the user could obtain this value from a *ContamLD* calculation on a male  
118 individual with a very low estimate of contamination based on *ANGSD*). The second option has  
119 more power than the first option and allows detection of cross-contamination by other ancient  
120 samples, but it could have biases if a good estimate of an un-contaminated individual from the  
121 same population is not available for the external correction.

122

123 We show that *ContamLD* accurately infers contamination in both ancient and present-day  
124 individuals of widely divergent ancestries with simulated contamination coming from individuals  
125 of different ancestries. The contamination estimates are highly correlated with estimates based  
126 on X chromosome analysis in ancient samples that are male, as assessed using the tool  
127 *ANGSD* (12). *ContamLD* run with the first option has standard errors less than 1.5% in samples  
128 with at least 500,000 sequences covering SNPs (~0.5x coverage for data produced by in-  
129 solution enrichment for ~1.2 million SNPs (2, 13), or ~0.1x coverage for data produced using  
130 whole-genome shotgun sequences), while the second option has standard errors less than  
131 0.5% in these situations, allowing users to detect samples with 5% or more contamination with  
132 high confidence so they can be removed from subsequent analyses.

133

## 134 **Results**

135  
136

137 *Simulations of Contamination in Present-Day Individuals:*

138 To test the performance of *ContamLD*, we simulated sequence level genetic data. For our first  
139 simulations, each uncontaminated individual was based on genotype calls from a present-day

140 individual from the 1000 Genomes Project dataset. To determine the sequence coverage at  
141 each site, we used genome data from a representative ancient individual of 1.02x coverage and  
142 in each case generated the same number of simulated sequences at each site, with allele type  
143 corresponding to that of the present-day individual (i.e. if the present day individual is  
144 homozygous reference at a site, all simulated alleles are of the reference type, while if the  
145 present day individual is heterozygous, simulated alleles are either of the reference or  
146 alternative type, with 50% probability of each). The damage status (i.e. whether it carries the  
147 characteristic C-to-T damage often observed in ancient DNA sequences) of each sequence was  
148 also determined based on the status of the ancient reference individual. Contaminating  
149 sequences were then “spiked-in” at varying proportions (0 to 40%), using an additional present-  
150 day individual from the 1000 Genomes Project to determine the contaminating allele type (see  
151 Methods). All contaminating sequences were defined to be undamaged, consistent with  
152 contamination coming from a non-ancient source.

153  
154 For most of the analyses reported in this study, we simulate data for SNP sites defined on the  
155 1.24 million SNP capture reagent (2, 13) that intersect with 1000 Genomes sites, after removing  
156 sex chromosome sites (leaving ~1.1 million SNPs). However, our software allows users to make  
157 panels based on their own SNP sets, and in a later section we report results from a larger panel  
158 (~5.6 million SNPs) provided with the software that can be used with shotgun sequenced  
159 samples, which has more power to measure contamination.

160  
161 We first analyzed data generated using a reference individual from the 1000 Genomes CEU  
162 population (Utah Residents (CEPH) with Northern and Western European Ancestry) and the  
163 SNP coverage profile of a 1.02x coverage ancient West Eurasian individual (I3756; see  
164 Methods). Supplementary Figure 1 illustrates the distribution of LOD (logarithm of the odds)  
165 scores generated when the algorithm is run on samples with 0%, 7% and 15% simulated

166 contamination. Supplementary Figure 2 shows all the estimates from 0 to 40%. At very high  
167 contamination (above 15%) *ContamLD* often overestimates the contamination rate, but in  
168 practice samples with above 10% contamination are generally removed from population genetic  
169 analyses, so inaccuracies in the estimates at these levels are not a concern in our view (the  
170 importance of a contamination estimate in many cases is to flag problematic samples, not to be  
171 able to accurately estimate the contamination proportion). *ContamLD* assumes that the  
172 individual making up the majority of the sequences is the base individual, so we do not explore  
173 contamination rates greater than 50% in these simulation studies.

174

175 We observe a linear shift in the contamination estimates such that most estimates are biased to  
176 be slightly higher than the actual value, with even greater overestimates occurring at higher  
177 contamination rates (Supplementary Figure 2). This is likely due to the difference between the  
178 haplotype distribution of the test individual and that of the haplotype panel, as the magnitude of  
179 this shift increases as the test individual increases in genetic distance from the haplotype panel.  
180 Even in cases where the test individual is of the same ancestry as the haplotype panel (as in  
181 Supplementary Figure 2) there is expected to be a shift, because the test individual's haplotypes  
182 are a particular sampling of the population's haplotypes, and the difference between having only  
183 frequencies of the haplotype panel and a particular instantiation of those frequencies in the test  
184 individual will lead to the artificial need for an external source ("contaminant") to fit the model  
185 properly. Further, we observe negative shifts for inbred individuals, as expected because the  
186 algorithm assumes the paternal and maternal copy of a chromosome are unrelated; if they are  
187 related, then extra LD will be induced and more contamination will be necessary to lead to the  
188 expected LD pattern. In principle, this inbreeding effect be corrected explicitly by estimating the  
189 total amount of ROH in each individual and applying this as a correction, although we do not  
190 provide such functionality as part of our software as there is not yet a reliable methodology for

191 quantifying the proportion of the genome that is affected by inbreeding in ancient individuals. In  
192 any case, a correction will always be necessary to address these biases.  
193  
194 In our implementation, we correct for these shifts in two ways, implemented as different options  
195 in *ContamLD*. The first option leverages sequences that contain C-to-T damage that is  
196 characteristic of ancient sequences. This option assumes these sequences are authentically  
197 ancient and not derived from a contaminating source (assumed to be from present-day  
198 individuals), so the *ContamLD* estimate based on un-damaged sequences is corrected by  
199 estimates based on the damaged sequences (see Methods for more details). In the second  
200 option, we allow the user to subtract the contamination estimate from the estimate of an  
201 individual of the same ancestry assumed to be uncontaminated. The second option has smaller  
202 standard errors than the first option (Figure 1), because it does not rely on estimates from  
203 damaged sequences (which have less power since they are a much smaller subset of the data).  
204 In addition, the second option allows one to estimate contamination in cases where the source  
205 of contamination is also ancient in origin (i.e. a contamination event that occurred anciently or  
206 due to cross contamination with other ancient samples), while the first option will likely produce  
207 an underestimate in these cases, since it assumes that sequences that contain C-to-T damage  
208 are not contaminated. However, the second option will generally not be reliable unless there is a  
209 relatively high coverage, ancestry-matched external sample for correction (with no inbreeding in  
210 either the sample of interest or the external sample). The rest of the analyses were based on  
211 the first option, but *ContamLD* includes both methods as options, and the uncorrected score  
212 forms the basis for warnings outputted by the software (e.g. high contamination or possible  
213 contamination with another ancient sample leading to an inaccurate damage correction  
214 estimate).  
215  
216



217 **A)**

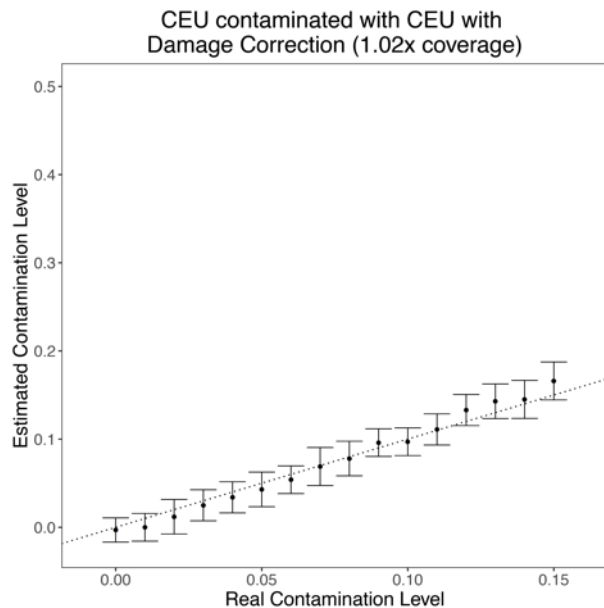

**B)**

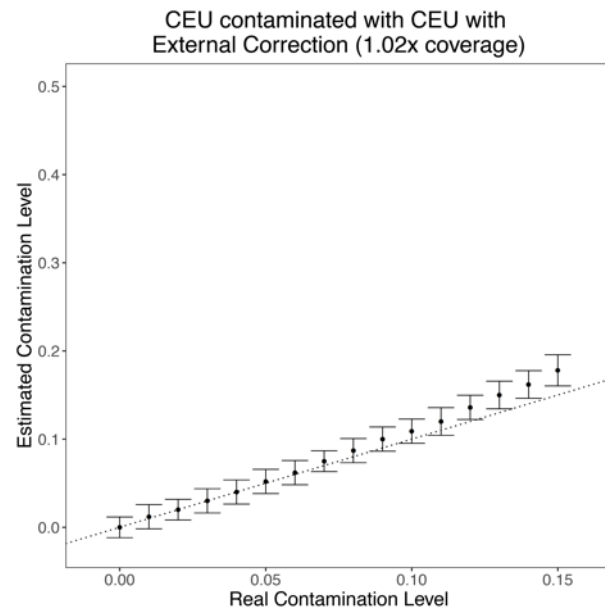

218

219 **Figure 1. *ContamLD* estimates when the uncontaminated source, contaminant source, and**  
220 **haplotype panel are all from the same population (CEU). Contamination estimates when the simulated**  
221 **contamination rate is between 0.00-0.15. **A)** Estimates with damage restricted correction (option 1). **B)****  
222 **Estimates with external correction from an uncontaminated sample (option 2). The black dotted line is**  
223  **$y=x$ , which would correspond to a perfect estimation of contamination. Error bars are  $1.96 \times$  standard error**  
224 **(95% confidence interval).**

225

226 *Simulated Contamination of Ancient Samples with Present-Day Samples:*

227 *ContamLD* is designed to work on ancient individuals, so we simulated contamination of real  
228 ancient individuals with present-day individuals from the 1000 Genomes Project, a scenario that  
229 would occur when skeletal material from ancient individuals is contaminated by present-day  
230 individuals during excavation or some point of the processing of the material. We used male  
231 individuals with very low contamination rates (less than 1% based on X chromosome estimates  
232 using *ANGSD* (12), which we subtracted from the *ContamLD* estimates to correct for any  
233 underlying contamination). Figure 2A shows results from an Iberian Bronze Age sample (14)  
234 (I3756) that has approximately 1.02x coverage at the targeted ~1.24 million SNP positions,

235 demonstrating that *ContamLD* produces highly accurate contamination estimates for this  
236 simulation.

237

### 238 *Effect of Different Haplotype Panels*

239 There are many potential cases in which ancient individuals can come from populations with  
240 very different genetic profiles to present-day 1000 Genomes populations, leading to an ancestry  
241 mis-match to the haplotype reference panels. *ContamLD* provides panels from all 1000  
242 Genomes populations as well as tools to identify the panel most closely matching to the  
243 ancestry of their ancient individual, which they can then select for the analysis. However, due to  
244 the potential for ancestry mis-match to still occur, we tested the effect of choosing haplotype  
245 panels that are genetically diverged from the individual of interest (Figure 2A). For the ancient  
246 Iberian sample, the CEU and TSI (Toscani in Italia) panels—representing northern and southern  
247 European ancestry, respectively—yielded contamination estimates that are close to the true  
248 contamination rate, especially for rates below 5%. However, *ContamLD* underestimates  
249 contamination by ~2% when the CHB (Han Chinese in Beijing, China) and YRI (Yoruba in  
250 Ibadan, Nigeria) panels were used instead (though we view these as unlikely cases, because  
251 the user should usually be able to choose a panel more closely related to their ancient individual  
252 than these scenarios). We thus recommend that users take care to choose an appropriate panel  
253 that is within the same continental ancestry as their ancient individual. Nevertheless, we note  
254 that we were able to obtain reasonably accurate estimates for Upper Paleolithic European  
255 hunter-gatherers, such as the Kostenki14 individual (15), who is ~37,470 years old, even when  
256 using present-day European panels that have significantly different ancestry from the hunter-  
257 gatherers (Supplementary Figure 3).

258

259

260 **A)**

### Ancient Iberian (1.02x coverage) contaminated with CEU using different panels

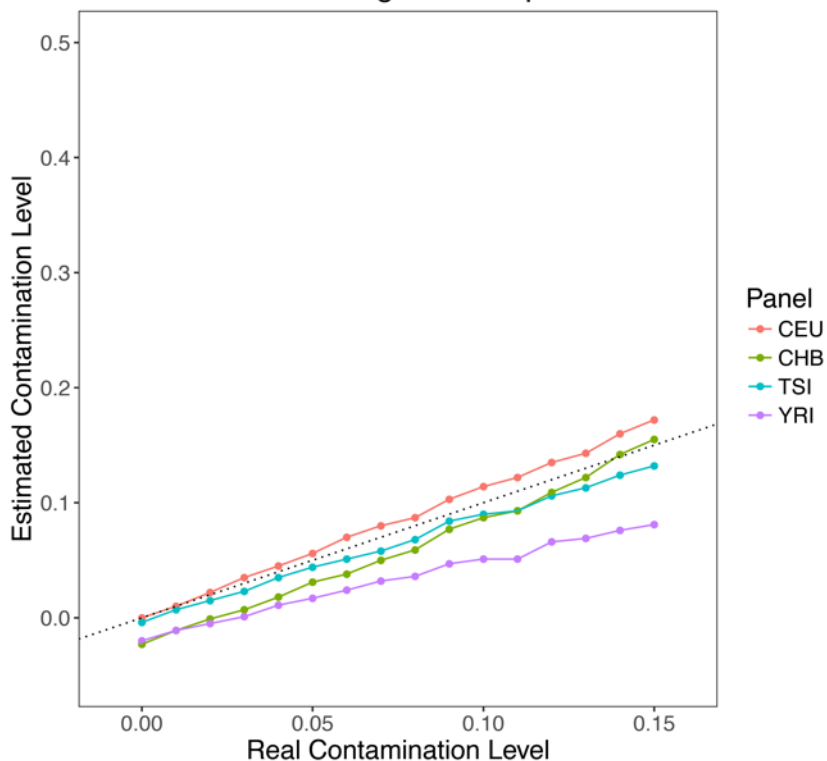

261

262 **B)**

### Ancient individuals contaminated with ancestries different from their own

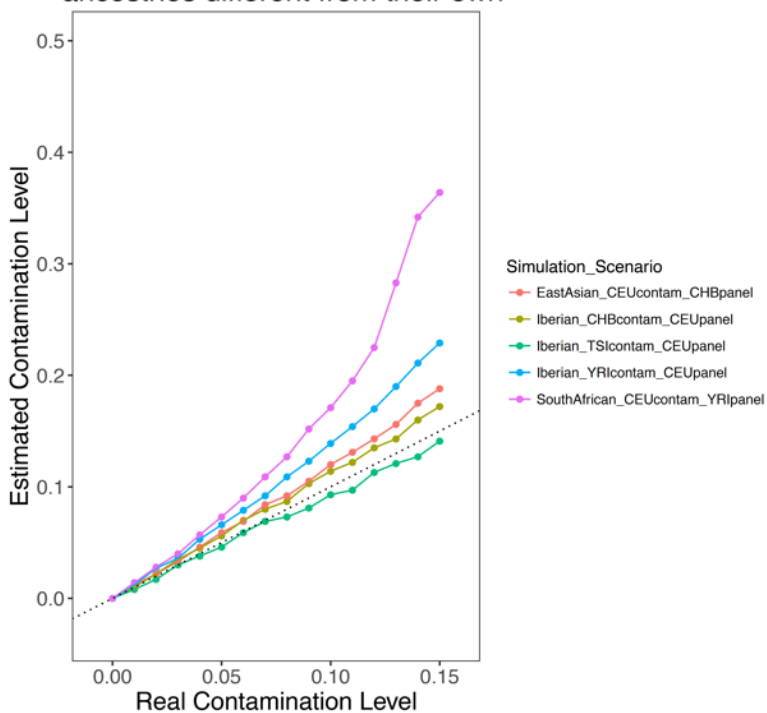

263

264 **Figure 2. Genetic distance between uncontaminated individual and contamination sources or**  
265 **haplotype panels impacts *ContamLD* estimates** **A)** Ancient Iberian (I3756, 1.02x coverage)  
266 contaminated with CEU with haplotype panels generated from CEU, TSI, CHB, and YRI populations. **B)**  
267 Contamination estimates from the same ancient Iberian contaminated with TSI, CHB, or YRI and  
268 analyzed with a CEU panel, from an ancient East Asian (DA362.SG, 1.10x coverage) contaminated with  
269 CEU and analyzed with a CHB panel, or from an ancient South African (I9028.SG, 1.21x coverage)  
270 contaminated with CEU and analyzed with a YRI panel. The black dotted line is  $y=x$ , which would  
271 correspond to a perfect estimation of the contamination. All samples had damage restricted correction  
272 applied (option 1).

273  
274 *Effect of Mismatch Between the Ancestry of the True Sample and Contaminating Individual*  
275 Contamination can come from a wide variety of sources, including, but not limited to, different  
276 members of the archaeological excavation team, the aDNA laboratory, or even residual human  
277 DNA on the plastic and glassware. Thus, we sought to understand the effect of mismatch in the  
278 ancestry of the true sample and the contaminating individual in our contamination estimates. We  
279 found that as the ancestry of the two diverged, *ContamLD* over-estimated contamination (Figure  
280 2B). This effect occurred when we tested an ancient European with different contaminant  
281 ancestries as well as when we tested ancient East Asian (16) and ancient South African (17)  
282 samples contaminated with European DNA. Nevertheless, the over-estimation was not severe  
283 at contamination levels below 5 percent, and samples above this proportion would likely be  
284 flagged as problematic. We also explored scenarios where the ancestry of the panel matches  
285 the contaminant rather than the true sample (Supplementary Figure 4) and found a ~2% under-  
286 estimate at low levels of contamination and an over-estimate at high levels of contamination,  
287 which we view as not problematic in practice for the same reasons as in the scenarios above.  
288 When we tested the effect of having multiple contaminant individuals (Supplementary Figure 5),  
289 we found no significant difference relative to having a single contaminant individual.

290  
291 *Effect of Coverage:*  
292 We tested the power of our procedure at different coverages (Figure 3). We found that while our  
293 estimates were not biased to produce estimates consistently above or below the true value, the  
294 standard errors increased significantly at lower coverages, as expected for the decreased power  
295 for accurate estimation in these scenarios. We provide a much larger panel with ~5.6 million  
296 SNPs (vs. ~1.1 million for the 1240K panel) that improves accuracy and usually decreases  
297 standard errors for samples that are shotgun sequenced (Supplementary Figure 6). This panel  
298 increases *ContamLD*'s compute time and memory requirements, though, so we recommend  
299 that it only be used for individuals with lower than 0.5x coverage. In addition, we provide users  
300 tools to create their own panels to meet their specific needs.  
301

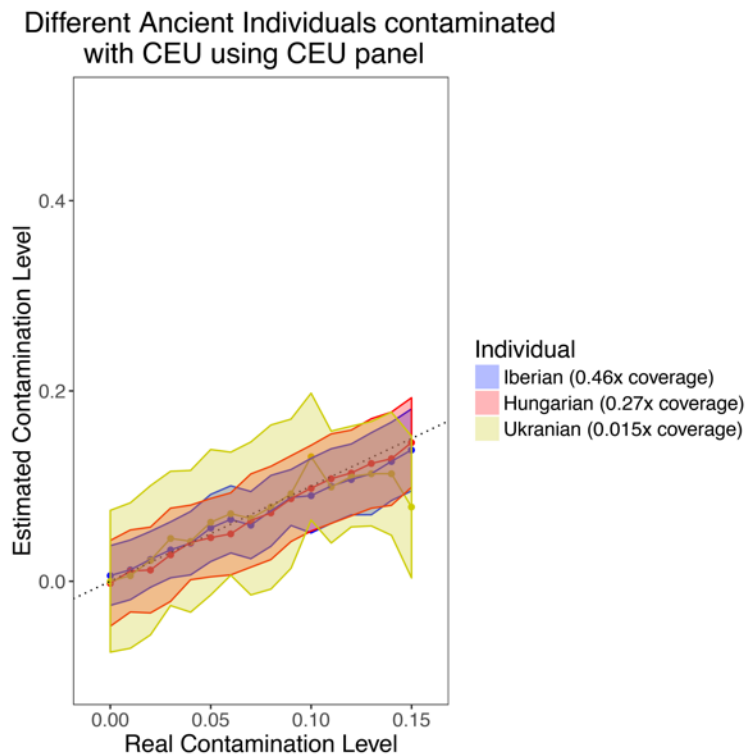

302  
303 **Figure 3. *ContamLD* estimates for ancient European samples of different coverages after damage**  
304 **restricted correction (option 1).** An ancient Iberian of 0.46x coverage, an ancient Hungarian of 0.27x

305 coverage, and an ancient Ukrainian of 0.015x coverage (~16,000 snps) were contaminated with CEU and  
306 analyzed using a CEU panel with *ContamLD* option 1 (damage restricted correction). The black dotted  
307 line is  $y=x$ . Error shading is  $1.96 \times$  standard error (95% confidence interval).

308

### 309 *Estimating Contamination in Admixed Individuals*

310 *ContamLD* relies on measuring the difference between the LD pattern of the sample and that  
311 expected from an uncontaminated individual. However, individuals from groups recently  
312 admixed between two highly divergent ancestral groups have LD patterns, in principle, similar to  
313 that of an unadmixed individual with contamination from a group with ancestry diverged from  
314 that of the individual of interest. To determine how this would impact *ContamLD*, we ran the  
315 software on an ASW (Americans of African Ancestry in Southwest USA) individual with different  
316 levels of added CEU contamination. When we ran *ContamLD* with a YRI panel and no  
317 correction on an individual with no contamination, the individual was inferred to have a  
318 contamination of ~20% (likely because the individual had ~15% European ancestry, and this  
319 was interpreted by the software as contamination). Using an ASW panel did not perform any  
320 better. However, the concerns were mostly addressed by the damage-restricted correction  
321 (option 1) at low contamination levels (Supplementary Figure 7). The simulation with African-  
322 Americans represents an extreme of difficulty, because the individual is from a group with very  
323 recent admixture (~6 generations (18)) of ancestries highly divergent from each other with one  
324 of the ancestries very genetically similar to the reference panel. It highlights how the damage-  
325 restricted correction is still able to produce accurate estimates in these difficult cases.

326

### 327 *Simulations to Compare ContamLD to ANGSD X Chromosome Estimates*

328 We performed simulations where we randomly added sequences at increasing levels from 0 to  
329 15% from an ancient West Eurasian individual (I10895) into the BAM files of 65 ancient male  
330 individuals of variable ancestries and ages (we set the damaged sequences to be only from the

331 non-contaminant individual; see Methods). We chose ancient male individuals that had average  
332 coverage over 0.5X and X chromosome contamination estimates under 2% (using method 1 of  
333 *ANGSD*) when no artificial contamination was added (and also corrected even for this baseline  
334 contamination by setting damaged reads to be a 5% down-sampling of the files that had no  
335 artificial contamination; see Methods). We then analyzed the individuals with *ContamLD* and  
336 *ANGSD* and found that compared to *ANGSD*, *ContamLD* consistently had the same or lower  
337 errors relative to the real contamination level (Figure 4, Supplementary Online Table 2).  
338

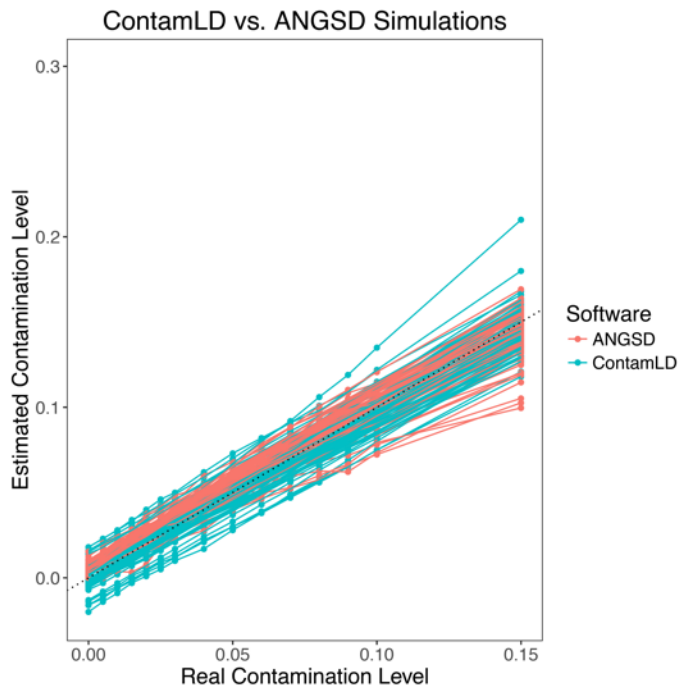

339  
340 **Figure 4. Contamination estimates with *ContamLD* and *ANGSD* for ancient individuals with**  
341 **different levels of contamination added in.** 65 ancient individuals with average coverage over 0.5X had  
342 increasing levels of artificial contamination added in (from I10895, an ~1200BP ancient West Eurasian  
343 individual) and were then analyzed with *ContamLD* (with panels most genetically similar to the ancient  
344 individual and using damage restricted correction, option 1) and *ANGSD*. Details of all estimates  
345 (including standard errors) are provided in Supplementary Online Table 2. The black dotted line is  $y=x$ ,  
346 which would correspond to a perfect estimation of the contamination.  
347

348 *Comparing ContamLD, ANGSD, and Mitochondrial Estimates (ContamMix) in Ancient*  
349 *Individuals without Added Contamination*

350 We tested 439 ancient males with *ContamLD*, *ANGSD* (X chromosome contamination  
351 estimates), and *ContamMix* (mitochondrial contamination estimates) without adding additional  
352 contamination. For this analysis, we included published data generated with the ~1.24 million  
353 SNP enrichment reagent, as well as data from the same sites that failed quality control due to  
354 evidence of contamination (Supplementary Online Table 3). Similar to prior studies (5), the  
355 mitochondrial estimates often differed from the nuclear (*ANGSD* and *ContamLD*) estimates,  
356 showing high contamination in some samples that had low nuclear contamination, and low  
357 mitochondrial contamination in some samples that had high nuclear contamination (Figure 5a).  
358 In contrast, *ANGSD* and *ContamLD* had better concordance. However, we observed that some  
359 of the samples with high contamination estimates based on *ANGSD* had much lower *ContamLD*  
360 estimates, reflecting over-correction from analyzing the damaged sequences, perhaps because  
361 the contamination was actually cross-contamination from other ancient individuals, violating the  
362 assumptions of our damage-correction (Figure 5b). This problem was mitigated in part,  
363 however, because *ContamLD* produces a warning of “Very\_High\_Contamination” if the  
364 uncorrected estimate is above 15% (even in cases where the corrected estimate is very low),  
365 and all samples with X chromosome estimates over 5% were flagged with this warning and/or  
366 had estimates of over 5% contamination with *ContamLD* (all samples with less than 5%  
367 contamination in *ANGSD* had lower than 5% contamination with *ContamLD*). It is unfortunately  
368 not possible to know the true contamination of the samples we tested in Figure 5, but the fact  
369 that our software produced results with good correlation to X chromosome estimates shows that  
370 it works well in real ancient data.

371 It is possible for there to be samples with moderately high contamination from another  
372 ancient individual but both a low damage restricted correction estimate and no warning  
373 generated, because these would have high uncorrected estimates, yet not high enough to reach



374 the threshold required for the warning. These samples would have to be identified with an  
375 external correction. Lowering the threshold for the “Very\_High\_Contamination” warning would  
376 produce too many false positives, because there are many cases with high uncorrected  
377 estimates that have low corrected estimates that are likely not contaminated (e.g. due to  
378 ancestry mismatches of the panel and the test individual). To understand these issues better,  
379 we performed a simulation in which an ancient Iberian (I3756) was contaminated with another  
380 ancient West Eurasian individual (I10895) and the damaged sequences were set to be a 5%  
381 down-sampling of the set of contaminated sequences (thus simulating a case in which all of the  
382 contamination is from another ancient individual who has the same damage proportion as the  
383 ancient individual of interest). We found that, as expected, the contamination from the ancient  
384 individual was not detected (the contamination estimates were always near 0%) by the damage  
385 restricted correction version of *ContamLD* until the contamination reached 15% at which point  
386 the “Very\_High\_Contamination” flag came up (Supplementary Figure 8). The contamination  
387 would have been detected with the external correction version of *ContamLD* (since the damage  
388 restricted correction continued to go up with increasing contamination; see Supplementary  
389 Online Table 4), but without an uncontaminated ancient individual of the same group as the  
390 target individual, this would be difficult to do without the possibility of bias in the contamination  
391 estimate.

392

393

394

395

396

397

398

399

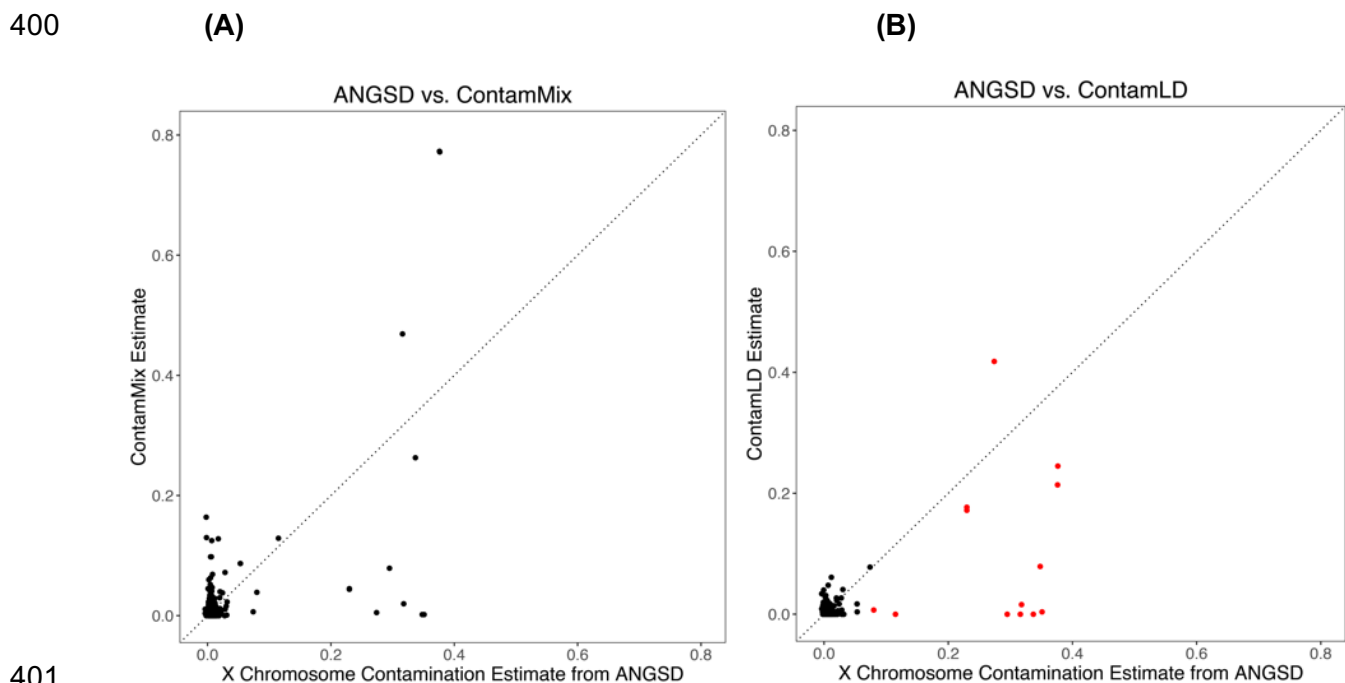

**Figure 5. Contamination estimates from *ContamLD*, *ANGSD*, and *ContamMix* in 439 ancient individuals of variable ancestry.** *ANGSD* estimates are plotted on the X-axis, and on the Y-axis are either (A) *ContamMix* or (B) *ContamLD* estimates. In red are samples that were flagged in *ContamLD* as “Very\_High\_Contamination” based on having uncorrected estimates over 15%. All *ContamLD* estimates below 0 were set to 0.

## 408 Discussion and Conclusion

409 We have presented a tool, *ContamLD*, for estimating rates of autosomal DNA contamination in  
410 aDNA samples. *ContamLD* is able to measure contamination accurately in samples of both  
411 male and female individuals, with standard errors less than 1.5% for individuals with coverage  
412 above 0.5X on the 1240K SNP set (for contamination levels less than 10%) for the damage  
413 restricted correction version (option 1). On the shotgun panel we provide, standard errors are  
414 less than 1.5% for coverages above 0.1x. *ContamLD* is best suited to scenarios in which the  
415 contaminant and the ancient individual of interest are similar ancestry, which is useful, because  
416 *DICE* (11) and many population genetic tools (e.g. *PCA* or *ADMIXTURE* (19)) are better suited

417 for detecting cases where the contaminant is of very different ancestry from the ancient  
418 individual of interest. *ContamLD* works even for recently admixed individuals. Lastly, *ContamLD*  
419 can detect cases of contamination from other ancient individuals, though this works best if it is  
420 large amounts of contamination that can reach the threshold required for the  
421 “Very\_High\_Contamination” flag.

422  
423 We tested *ContamLD* in multiple different simulation scenarios to determine when bias or less  
424 reliable results would occur. When applied to the situation with a test individual (ancient or  
425 present-day), contaminant, and haplotype reference panel all from the same continental  
426 ancestry, *ContamLD* provides an accurate, un-biased estimate of the contamination. When the  
427 contaminant comes from a population that is of a different continental ancestry from the  
428 population used for the base and haplotype panel, the contamination appears to be slightly  
429 overestimated, particularly for higher contaminations. This should not be a large problem in  
430 analyses of real (i.e. non-simulated) data, however, because the effect is small at the  
431 contamination levels of interest (<5%). When we varied haplotype panels, we found that the  
432 estimator is robust when applied to simulated datasets using haplotype panels that are  
433 moderately divergent from the base sample (within-continent variation). We provide users tools  
434 for automatically determining the panel that shared the most genetic drift with the sample so that  
435 the user can use the panel most closely related to the sample. In other simulations, we found  
436 that the performance of the algorithm declines as the coverage of the sample decreases. The  
437 estimates are not unbiased, but the standard errors significantly increase when fewer than  
438 300,000 sequences are available for analysis. In these cases, if the individual was shotgun  
439 sequenced, we recommend that users choose the shotgun panel, which will substantially  
440 increase power for the analyses.

441

442 We applied the algorithm to estimate contamination levels in dozens of ancient samples and  
443 compared them to X chromosome based contamination estimates. There was generally good  
444 correlation with the X chromosome estimates, except that when contamination was very high,  
445 the LD based estimates were sometimes estimated incorrectly due to over-correction from the  
446 damage estimates. This problem is mitigated, however, because the software indicates if the  
447 uncorrected estimate is very high so users can identify highly contaminated samples and  
448 remove them from further analyses. A difficult case for the software is if there is contamination  
449 in part from another ancient sample. This can cause an over-correction and lead to an under-  
450 estimate of the contamination. The “Very\_High\_Contamination” warning catches very high  
451 contamination from other ancient samples, but it will miss cases of moderate levels of  
452 contamination from other ancient samples, because it will not reach the threshold required for  
453 the warning. In theory, the user can determine the true contamination in these cases using the  
454 external correction, but the external correction can be difficult if the user does not have an  
455 adequate sample to correct the estimate of the sample of interest. The damage correction of the  
456 software also does not work if the samples have undergone full UDG treatment (no damaged  
457 sequences), and for this case, the external correction is the only option.

458

459 The software run-time is dependent on the SNP coverage. If ~1,000,000 SNPs are covered (the  
460 depth of the coverage on each SNP does not affect run-time), the full analysis for the sample  
461 will be approximately 2 hours if 3 cores are available on CentOS 7.2.15 Linux machines (~25  
462 GB of memory). The software is designed for samples to be run in parallel, so the total time for  
463 analysis even for large numbers of samples is often not much greater than the time for a single  
464 sample.

465

466 In summary, *ContamLD* is able to estimate autosomal nuclear contamination in ancient DNA  
467 accurately with standard errors that depend on the coverage of the sample. This will be

468 particularly useful for female samples where X chromosome estimates are not possible. As a  
469 general recommendation for users, we believe in most cases all samples with a contamination  
470 estimate that is greater than 0.05 (5%) should be removed from further analyses, or the  
471 contamination should be explicitly modeled in population genetic tests.

472

## 473 **Supplementary Data:**

474

475 Supplementary Data include an Excel spreadsheet detailing all ancient samples used and the

476 contamination estimates for this algorithm. Also included are 8 supplementary figures.

477

## 478 **Materials and Methods**

479

### 480 **Datasets:**

481

#### 482 *Present-day samples:*

483 Genome wide data from the 1000 Genomes Project dataset (20) were used as present-day

484 reference samples. We restricted to sites included in the aDNA ~1.24 million SNP capture

485 reagent (2, 13) and to SNPs at greater than 10% minor allele frequency in the 1000 Genomes

486 Project dataset (20). However, the software allows users to make panels based on their own

487 SNP set. In the analyses presented here, we filtered for SNPs that were present in the 1000

488 Genomes dataset and also removed all sex chromosome SNPs leading to 1,085,678 SNPs in

489 the final 1240K dataset and 5,633,773 SNPs in the final shotgun dataset.

490

#### 491 *Ancient samples:*

492 We analyzed mitochondrial and X chromosome contamination estimates (12, 21) from ancient

493 individuals from previous studies generated by shotgun sequencing or targeted enrichment with

494 1.24 million SNP enrichment, including many samples that failed quality control due to

495 contamination but were from the same archaeological sites (2, 17, 22-28). Information about the

496 ancient individual data are detailed in Supplementary Online Table 1 and below.

497

498 *Obtaining sequence information:*

499 For each ancient individual, we generated the sequence-depth data from the sample bam file,  
500 counting the number of reference and alternative alleles at each SNP site in the analysis  
501 dataset. Damage-restricted data was generated by restricting to sequences with PMD scores  
502 greater than or equal to 3 (4). Our software can accommodate both genotype call data as well  
503 as sequence data (the sequence data adds additional power to the analyses), but all analyses  
504 were performed using the sequence-based method. We provide users with tools to pull down  
505 read count data from BAM files in the format required for *ContamLD*.

506

### 507 **Haplotype Calculation**

508

509 To create haplotype panels, we obtained all SNP pairs in high LD for each 1000 Genomes  
510 population using PLINK version 1.9 (29) with  $r^2$  cut-off of 0.2. (Users can increase power slightly  
511 at the expense of increased computational time by creating their own haplotype panel with a  
512 lower  $r^2$  cutoff). We then calculated the frequencies of each SNP in all of these pairs as well as  
513 the haplotype frequencies at each of these pairs while holding out the present-day individuals  
514 used for contamination simulation.

515

### 516 **Algorithm to Estimate Contamination**

517

518 Our goal is to estimate  $\alpha$ , the level of contamination, by examining the frequencies of SNP pairs  
519 that should be in LD (we term this two-SNP pair a haplotype) and determining how much their  
520 frequencies differ from what would be expected under no contamination. To estimate this, we  
521 need both the distribution underlying the haplotypes ( $q$ ) that an uncontaminated test sample  
522 should have as well as the distribution of "unrelated haplotypes" ( $p$ ) that would form by chance  
523 from background allele frequencies.

524

525 To determine  $q$  we must account for the fact that the test individual's genotypes are not phased.  
526 Due to the low sequence depths at each SNP in ancient DNA, it is difficult to make confident  
527 heterozygous calls, so instead we create pseudo-haploid calls by randomly choosing a  
528 sequence to represent the genotype at that position (this holds when we are using genotype  
529 calls or the sequence information directly, and when multiple sequences cover the same SNP,  
530 we use all of them and treat them as independent). Thus, for this analysis, when examining a  
531 pair of SNPs, it is equally likely for the SNP pair to have been formed from the true haplotype (if  
532 the same parental chromosome is sampled from in both SNPs of the haplotype) or the  
533 background distribution (if the opposite parental chromosome is sampled from). We therefore  
534 can estimate  $q$  as:

$$q = p/2 + \tilde{p}/2$$

535  
536  
537 where  $\tilde{p}$  is the distribution of true haplotypes and  $p$  is the distribution of unrelated haplotypes  
538 that would form by chance from background allele frequencies. For inbred samples, the weight  
539 on  $\tilde{p}$  is more than 1/2, because the two parental chromosomes are more related, but this can  
540 generally be corrected (see below).

541  
542  $\tilde{p}$  can be estimated from an external reference panel using a maximum likelihood estimator  
543 (MLE). This would be:

$$\log(L(h|c)) = \sum_{j=1}^n \sum_{i=1}^4 c_{ij} \log(P(i, j|h))$$

544  
545  
546 with:

$$P(i, j|h) = \sum_{a_1, a_2, b_1, b_2=0,1; a, b \rightarrow (i, j)} h_{(a_1, b_1)} * h_{(a_2, b_2)}$$



549

550 where  $P(i, j|h)$  is the (unknown) diploid count distribution of the haplotypes of the test individual,  
551  $n$  is the number of SNP pairs,  $c$  is the vector of observed haplotypes in the diploid count panel,  $i$   
552 sums over all 4 haplotype possibilities,  $h_{(a,b)}$  are the (also unknown) haplotype distributions of  
553 the parents of the test individual, and  $a, b \rightarrow (i, j)$  implies that  $a_1 + a_2 = i$  and  $b_1 + b_2 = j$ , meaning  
554 that one adds up all cases where the haplotype combination would lead to a particular diploid  
555 count (e.g. in the notation, for example, 01,11 means the first parent contributes a haplotype  
556 that has 0 alternative alleles at the first SNP and 1 alternative allele at the second SNP, and the  
557 second parent contributes a haplotype where both SNPs have the alternative allele. The test  
558 individual with these parents would then have a 12 diploid count, which means at the first SNP  
559 the individual has 1 alternative allele and at the second SNP the individual has 2 alternative  
560 alleles. Since our observed data are not phased, both 01,11 and 11,01 would lead to a 12  
561 diploid count). This assumes independence of SNP pairs, which is not true, but because our  
562 standard errors are based on jackknife resampling across chromosomes, this assumption does  
563 not bias the error estimates.

564

565 The MLE would be computationally intractable to solve due to our lack of knowledge of which  
566 parent contributed to each count, so we instead used a simple EM algorithm to obtain  $h$ . The  
567 algorithm involved an expectation step of:

568

$$n_1 = \frac{C_{(i,j)} * \sum_{a,b \rightarrow (i,j)} h_{(a,b)} * h_{(a_2,b_2)}}{P(i, j|h)}$$

569

570

571 where  $n_1$  is the expected number of times that the  $(a, b)$  configuration of the father's  
572 chromosome contributed to a particular diploid count (this is the same value for the mother,  $n_2$ ,  
573 because they are assumed to be from the same haplotype distribution).

574

575 and a maximization step of:

576 
$$D_{(a,b)} = \sum_{(i,j)} C_{(i,j)} * [n_1 + n_2]$$

577 
$$h_{(a,b)}^{\hat{}} = \frac{D_{(a,b)}}{\sum_{a,b} D_{(a,b)}}$$

578

579 where  $D(a,b)$  is the sum of the probabilities of a particular haplotype configuration over all  
580 diploid count configurations.

581

582 We initially set all  $h(a,b)$  to be 0.25 and then iterated through the algorithm until convergence  
583 (using a squared distance summed over all SNPs and a threshold of 0.001). We then used this  
584 estimate of  $\tilde{p}$  to get an estimate of  $q$ .

585

586 To estimate  $\alpha$ , we used the equation:

587

588 
$$T = (1 - 2\alpha' + 2\alpha'^2)q + 2\alpha'(1 - \alpha')p$$

589

590 Here  $T$  is the distribution underlying the observed haplotypes of the test individual and  $\alpha'$  is the  
591 contamination (' is used to indicate that this is an estimate of the real  $\alpha$ ).  $q$  is the haplotype  
592 distribution for an uncontaminated sample. A fraction  $(1 - \alpha')^2 + \alpha'^2$  of the distribution should  
593 look like this, where  $(1 - \alpha')^2$  is the probability that two uncontaminated sequences form the  
594 SNP pair and  $\alpha'^2$  is the probability that two contaminated sequences form the SNP pair,  
595 assuming the contaminating sequences are from a single individual, which would "re-form" a

596 SNP pair with LD (note: this also makes the simplifying assumption that the contaminant and  
597 the test individual have the same background haplotype and SNP distribution).  $p$  is the  
598 distribution of unrelated “haplotypes” that would form by chance from background allele  
599 frequencies in the population. Contamination would form these unrelated haplotypes by  
600 breaking up LD, so  $2\alpha'(1 - \alpha')$  percent of the distribution should look like this (i.e. the probability  
601 that the SNP pair is formed from a contaminated sequence and an uncontaminated sequence).  
602  
603 This equation can be used to solve for  $\alpha'$  by maximizing the LOD (log of the odds) scores under  
604 the null hypothesis that  $\alpha' = 0$  and the alternative hypotheses of different  $\alpha'$ . A LOD score is  
605 assigned to each estimate of the contamination rate ( $\alpha$ ) between -0.1 to 0.5 (negative scores  
606 are included to allow correction for inbreeding). The  $\alpha'$  with the highest LOD score is the best  
607 estimate of  $\alpha$ , and is returned. When we have multiple sequences on the same SNP we assume  
608 independence of the sequences, which provides additional power. The assumption of  
609 independence does not bias the error estimation for the same reason as explained above for  
610 independence of SNP pairs.

611  
612 In practice, the  $\alpha'$  that we obtain is not equal to the true  $\alpha$ , because the reference panel does not  
613 perfectly capture the SNP and haplotype frequencies of the test sample. We found that this  
614 difference causes a linear shift in contamination estimate where the mismatch between the  
615 sample individual and the reference panel leads to a positive shift while inbreeding leads to a  
616 negative shift. These biases can be addressed in either of two ways.

617  
618 First, for the “damage correction” approach, we performed an  $\alpha'$  estimate only on sites from  
619 sequences with evidence of damage characteristic of ancient samples. These sites do not have  
620 present-day contamination and thus the  $\alpha'$  calculated would be the linear shift, which can be

621 subtracted out from the estimate based on all sites. We separately analyzed the following pairs  
622 of SNPs: UU (both SNPs at undamaged sequences), DU (one site damaged and the other  
623 undamaged), and DD (both SNPs at damaged sequences). For the UU pairs, the value we  
624 calculate would be  $\alpha + k$ , where  $k$  is the linear shift. For DU pairs the value calculated would be  
625  $\alpha/2 + k$ , and for DD pairs the value calculated would be  $k$ . We added the likelihoods for these  
626 pairs and maximized the likelihood to solve for  $\alpha$  and  $k$ . After solving for  $\alpha$ , we multiply by (1-  
627 damage rate) to obtain the contamination level across all sequences, because  $\alpha$  is the  
628 contamination rate at undamaged sequences.

629

630 Second, for the “external correction” approach, we took samples of the sample population that  
631 were high coverage and samples we believed had very low contamination (based on X  
632 chromosome estimates with *ANGSD*) and measured  $\alpha'$ . We assumed a true contamination of 0  
633 for these samples and thus subtracted this  $\alpha'$  from all other contamination estimates.

634

635

#### 636 **Data simulation:**

637

638 To test the accuracy of the algorithm, we applied it to a variety of scenarios with both present-  
639 day DNA as well as real aDNA samples that had simulated present-day DNA contamination. In  
640 all our simulations with 1000 Genomes individuals, we removed the individual being used from  
641 our haplotype panel before performing the analyses.

642

#### 643 *Simulated Contamination of Present-day Individuals:*

644 We first simulated contamination of present-day individuals with other present-day individuals as  
645 contaminants (this allowed us to be sure that there was no baseline contamination). In order to  
646 best approximate the distribution of both the damaged and undamaged sequences that is

647 characteristic of aDNA data, we used sequence-depth information from an ancient individual as  
648 a reference. At each SNP, the total number of simulated “damaged” and “undamaged”  
649 sequences was determined based on the number of damaged and undamaged sequences at  
650 the SNP in the reference ancient individual. The identity of each allele for the present-day  
651 “base” sample was randomly chosen based on the genotype of the “base” present-day 1000  
652 Genomes individual at each SNP, as described above for the contamination. The addition of  
653 contaminant sequences to the dataset was performed using the method described above. In  
654 order to reduce bias caused by the damage correction procedure, the damage restricted dataset  
655 was generated only once for each simulation type (which included multiple simulations across  
656 varying contamination rates) and combined with the undamaged dataset to produce the overall  
657 dataset. This method was used to generate a simulated individual using present-day CEU  
658 (NA06985) or ASW (NA19625) from the 1000 Genomes dataset as the “base” sample from the  
659 sequence distributions of a 1.02x coverage ancient Iberian individual (I3756) (the “reference”)  
660 (14). The CEU (NA06984) individual was used as “contaminant” in each case.

661  
662 In addition, we generated simulated data with contamination from multiple sources by adjusting  
663 the present-day contamination simulation method to randomly sample from two or more  
664 present-day source contaminant genomes with equal probability. In each case, a 1000  
665 Genomes Project CEU individual (NA06985) was used as a “base” genome with the sequence  
666 distribution of I3756 (the “reference”). In the case of 2 sources of contamination (Supplementary  
667 Figure 5), two CEU individuals from the 1000 Genomes Project dataset (NA06984 and  
668 NA06986) were used as contamination sources, and in the case of three contamination  
669 sources, an additional CEU individual was used (NA06989). Data was generated for all  
670 combinations of undamaged contamination rates,  $\alpha$ , from 0-15%.

671  
672

673 *Simulated contamination of ancient individuals:*

674 We performed two sets of simulations contaminating different ancient individuals. In both cases  
675 we selected ancient male individuals with minimal contamination (as assessed by X  
676 chromosome contamination levels from *ANGSD* (12)) to act as the “base” uncontaminated  
677 genome. In the first simulation set, we tested *ContamLD*'s performance with different ancient  
678 individuals and different present-day contaminant individuals from the 1000 Genomes dataset  
679 (20) to assess the impact of contaminant ancestry and coverage of the ancient individual. In this  
680 case we were only using *ContamLD* and thus we performed the simulated contamination on the  
681 genotype level. In the second simulation set, we compared *ContamLD* to *ANGSD* and used a  
682 ~1200BP ancient West Eurasian individual (I10895) to contaminate the BAM files directly.

683

684 In the first simulation set, we used the fact that sequences with C-to-T damage are highly  
685 unlikely to be the product of contamination except in the context of cross-contamination by  
686 another ancient DNA sample. Thus, we exclusively added contamination to the “undamaged”  
687 fraction of sequences. At each SNP site, we classified sequences present in the damage  
688 restricted dataset as “damaged” and added to the simulated SNP data. We classified all other  
689 sequences as “undamaged” and also added them to the simulated SNP data, but for each  
690 “undamaged sequence” we added a contaminant sequence to the simulated SNP data with  
691 probability  $\alpha/(1-\alpha)$ , where  $\alpha$  is equal to the contamination rate (since the added sequences  
692 contribute to the total number of sequences, we needed to add a higher proportion than the  
693 contamination rate to obtain our desired contamination rate). The identity of the added  
694 contaminant allele was randomly chosen based on the genotype of the chosen “contaminant”  
695 present-day genome at the site (i.e. if the contaminant individual was homozygous at the site,  
696 the allele it possesses would be added to the simulated individual, while if it were heterozygous  
697 at the site, either the reference or alternative allele would be selected randomly and added to  
698 the simulated individual). This method maintains the underlying distribution of “uncontaminated”

699 reference and alternative alleles at each SNP site, while adding additional “contaminant” alleles  
700 to each site, producing an overall contamination rate of  $\alpha$  in the undamaged sequences. For  
701 each simulation, we generated two output files: (1) a file reporting the total number of  
702 sequences carrying reference and alternative alleles at each SNP and (2) a damage restricted  
703 file reporting the total number of damaged sequences carrying reference and alternative alleles  
704 at each SNP. We used a 1.02x coverage ancient Iberian individual (I3756) (Supplementary  
705 Online Table 1) with contamination from either the 1000 Genomes CEU individual NA06984, the  
706 TSI individual NA20502, the CHB individual NA18525, or the YRI individual NA18486. We also  
707 used 5 other ancient individuals, I1845 (an ancient Iberian sample of 0.46x coverage) (14),  
708 I2743 (an ancient Hungarian of 0.27x coverage) (25), I5891 (a Neolithic Ukranian individual of  
709 0.016x coverage) (30), DA362.SG (a Russian early Neolithic Shamanka East Asian individual of  
710 1.10x coverage) (16), and I9028.SG (a South African individual of 1.21x coverage) (17). In each  
711 case, we simulated individuals with 0-15% contamination.

712  
713 For the second simulation set, we analyzed 65 ancient individuals of average coverage over  
714 0.5X and baseline *ANGSD* estimates under 2% (Supplementary Online Table 2). In these  
715 cases, we added artificial contamination with sequences from a ~1200BP ancient West  
716 Eurasian individual (I10895) into the BAM files at the amounts: (0.000, 0.005, 0.010, 0.020,  
717 0.025, 0.030, 0.040, 0.050, 0.060, 0.070, 0.080, 0.090, 0.100, 0.150). We removed two base  
718 pairs from the end of each sequence of partial UDG treated samples and ten nucleotides for  
719 non-UDG treated samples and pulled down the genotypes by randomly selecting a single  
720 sequence at each site covered by at least one sequence in each individual to represent the  
721 individual’s genotype at that position (“pseudo-haploid” genotyping). To ensure that the damage  
722 sequences were only from the non-contaminant individual (so that we could use the damage  
723 restricted correction mode, option 1, of *ContamLD* without bias), we created the “damaged”  
724 sequence set as a randomly chosen 5% of the sequences from the non-contaminant individual.

725 We then analyzed the data with *ContamLD* (damage restricted correction version, option 1) and  
726 *ANGSD* using default settings (Method 1).

727

728 As a last simulation, we tested the case of an ancient individual contaminating another ancient  
729 individual where some of the damaged sequences would also come from the contaminating  
730 individual. In this simulation, we analyzed a 1.02x coverage ancient Iberian individual (I3756)  
731 and contaminated the BAM with sequences from a ~1200BP ancient West Eurasian individual  
732 (I10895) at the amounts: (0.000, 0.005, 0.010, 0.020, 0.025, 0.030, 0.040, 0.050, 0.060, 0.070,  
733 0.080, 0.090, 0.100, 0.150, 0.200, 0.300). We then down-sampled the BAM, taking a random  
734 5% of the sequences of these contaminated BAM files to act as the “damaged” sequences,  
735 because this would naturally correct for any baseline contamination in the I3756 individual yet  
736 would simulate additional contamination of I3756 by an ancient individual with the same  
737 damage rate as I3756 (i.e. if there is 5% contamination, then also 5% of the damaged  
738 sequences would be from the contaminant individual in this simulation). We then performed the  
739 standard pull-down on both the full contaminated BAMs and the 5% down-sampled BAMs  
740 (simulated to be “damaged” sequences), removing two base pairs from the end of each  
741 sequence and doing a “pseudo-haploid” genotype pulldown. We ran *ContamLD* on the resulting  
742 data with damage restricted correction, option 1.

743

744 *Direct Analyses of Contamination Levels in Ancient Individuals:*

745 As our last set of analyses, we directly measured contamination levels in ancient individuals  
746 without simulated contamination. We used *ContamLD* to analyze shotgun sequenced  
747 individuals pulled down onto the 1240K SNP set and the shotgun panel created using all  
748 variants above 10% frequency in the 1000 Genomes dataset. The ancient shotgun sequenced  
749 individuals were of 0.1-0.5x coverage from Allentoft *et al.*, 2015 (26), Damgaard *et al.*, Nature  
750 2018 (31), and Damgaard *et al.*, Science 2018 (16). In addition, we analyzed 439 individuals



751 from a variety of ancestries with *ContamLD* (damage corrected version), *ANGSD* (12, 32) using  
752 default settings (we report the results from Method 1), and *contamMix* (33) with the settings:  
753 down-sampling to 50X for samples above that coverage, --trimBases X (2 bases for UDG-half  
754 samples and 10 bases for UDG-minus samples), 8 threads, 4 chains, and 2 copies, taking the  
755 first one that finishes. Supplementary Online Table 1 includes all information from these  
756 individuals.

757

## 758 **Declarations**

759

### 760 **Ethics Approval and Consent to Participate**

761 Not applicable (all samples were from previously published studies).

762

### 763 **Consent for publication**

764 Not applicable.

765

### 766 **Availability of Data/Materials and Requirements:**

767 All data analyzed in this article are available in (2, 16, 17, 22-28, 31). The software is available  
768 at: <https://github.com/nathan-nakatsuka/ContamLD>. It requires Python 3 and R (any version  
769 should suffice). Scripts for data simulations are available upon request.

770

### 771 **Competing interests:**

772 The authors declare that they have no competing interests.

773

774

775 **Funding:**

776 Funding was provided by an NIGMS (GM007753) fellowship to NN and a MHAAM fellowship to  
777 EH. DR is an Investigator of the Howard Hughes Medical Institute and this work was supported  
778 by grants HG006399 and GM100233 from the National Institutes of Health and by grant 61220  
779 from the John Templeton Foundation.

780

781 **Authors' Contributions:**

782 N.N., E.H., N.P., and D.R. conceived the study. N.N., E.H., and S.M. performed analysis. N.N.,  
783 E.H., and D.R., wrote the manuscript with the help of all co-authors.

784

785 **Acknowledgements:**

786 We thank Iosif Lazaridis and Mark Lipson for helpful discussions.

## 787 **References**

- 788 1. Dabney J, *et al.* (2013) Complete mitochondrial genome sequence of a Middle  
789 Pleistocene cave bear reconstructed from ultrashort DNA fragments. *Proc Natl Acad Sci*  
790 *U S A* 110(39):15758-15763.
- 791 2. Haak W, *et al.* (2015) Massive migration from the steppe was a source for Indo-  
792 European languages in Europe. *Nature* 522(7555):207-211.
- 793 3. Rohland N, Harney E, Mallick S, Nordenfelt S, & Reich D (2015) Partial uracil-DNA-  
794 glycosylase treatment for screening of ancient DNA. *Philos Trans R Soc Lond B Biol Sci*  
795 370(1660):20130624.
- 796 4. Skoglund P, *et al.* (2014) Separating endogenous ancient DNA from modern day  
797 contamination in a Siberian Neandertal. *Proc Natl Acad Sci U S A* 111(6):2229-2234.
- 798 5. Sawyer S, *et al.* (2015) Nuclear and mitochondrial DNA sequences from two Denisovan  
799 individuals. *Proc Natl Acad Sci U S A* 112(51):15696-15700.
- 800 6. Fu Q, *et al.* (2013) DNA analysis of an early modern human from Tianyuan Cave, China.  
801 *Proc Natl Acad Sci U S A* 110(6):2223-2227.
- 802 7. Green RE, *et al.* (2008) A complete Neandertal mitochondrial genome sequence  
803 determined by high-throughput sequencing. *Cell* 134(3):416-426.
- 804 8. Green RE, *et al.* (2010) A draft sequence of the Neandertal genome. *Science*  
805 328(5979):710-722.
- 806 9. Cibulskis K, *et al.* (2011) ContEst: estimating cross-contamination of human samples in  
807 next-generation sequencing data. *Bioinformatics* 27(18):2601-2602.
- 808 10. Jun G, *et al.* (2012) Detecting and estimating contamination of human DNA samples in  
809 sequencing and array-based genotype data. *Am J Hum Genet* 91(5):839-848.
- 810 11. Racimo F, Renaud G, & Slatkin M (2016) Joint estimation of contamination, error and  
811 demography for nuclear DNA from ancient humans. *PLoS genetics* 12(4).

- 812 12. Korneliussen TS, Albrechtsen A, & Nielsen R (2014) ANGSD: Analysis of Next  
813 Generation Sequencing Data. *BMC Bioinformatics* 15:356.
- 814 13. Mathieson I, *et al.* (2015) Genome-wide patterns of selection in 230 ancient Eurasians.  
815 *Nature* 528(7583):499-503.
- 816 14. Olalde I, *et al.* (2019) The genomic history of the Iberian Peninsula over the past 8000  
817 years. *Science* 363(6432):1230-1234.
- 818 15. Seguin-Orlando A, *et al.* (2014) Genomic structure in Europeans dating back at least  
819 36,200 years. *Science* 346(6213):1113-1118.
- 820 16. de Barros Damgaard P, *et al.* (2018) The first horse herders and the impact of early  
821 Bronze Age steppe expansions into Asia. *Science* 360(6396):eaar7711.
- 822 17. Skoglund P, *et al.* (2017) Reconstructing Prehistoric African Population Structure. *Cell*  
823 171(1):59-71 e21.
- 824 18. Patterson N, *et al.* (2004) Methods for high-density admixture mapping of disease  
825 genes. *The American Journal of Human Genetics* 74(5):979-1000.
- 826 19. Alexander DH, Novembre J, & Lange K (2009) Fast model-based estimation of ancestry  
827 in unrelated individuals. *Genome Res* 19(9):1655-1664.
- 828 20. Genomes Project C, *et al.* (2015) A global reference for human genetic variation. *Nature*  
829 526(7571):68-74.
- 830 21. Renaud G, Slon V, Duggan AT, & Kelso J (2015) Schmutzi: estimation of contamination  
831 and endogenous mitochondrial consensus calling for ancient DNA. *Genome Biol* 16:224.
- 832 22. Lazaridis I, *et al.* (2014) Ancient human genomes suggest three ancestral populations  
833 for present-day Europeans. *Nature* 513(7518):409-413.
- 834 23. Lazaridis I, *et al.* (2016) Genomic insights into the origin of farming in the ancient Near  
835 East. *Nature* 536(7617):419-424.
- 836 24. Lazaridis I, *et al.* (2017) Genetic origins of the Minoans and Mycenaeans. *Nature*  
837 548(7666):214-218.

- 838 25. Lipson M, *et al.* (2017) Parallel palaeogenomic transects reveal complex genetic history  
839 of early European farmers. *Nature* 551(7680):368-372.
- 840 26. Allentoft ME, *et al.* (2015) Population genomics of Bronze Age Eurasia. *Nature*  
841 522(7555):167-172.
- 842 27. Keller A, *et al.* (2012) New insights into the Tyrolean Iceman's origin and phenotype as  
843 inferred by whole-genome sequencing. *Nat Commun* 3:698.
- 844 28. Olalde I, *et al.* (2018) The Beaker phenomenon and the genomic transformation of  
845 northwest Europe. *Nature* 555(7695):190.
- 846 29. Purcell S, *et al.* (2007) PLINK: a tool set for whole-genome association and population-  
847 based linkage analyses. *Am J Hum Genet* 81(3):559-575.
- 848 30. Mathieson I, *et al.* (2018) The genomic history of southeastern Europe. *Nature*  
849 555(7695):197.
- 850 31. de Barros Damgaard P, *et al.* (2018) 137 ancient human genomes from across the  
851 Eurasian steppes. *Nature* 557(7705):369.
- 852 32. Durvasula A, *et al.* (2016) angsd-wrapper: utilities for analysing next-generation  
853 sequencing data. *Mol Ecol Resour* 16(6):1449-1454.
- 854 33. Fu Q, *et al.* (2014) Genome sequence of a 45,000-year-old modern human from western  
855 Siberia. *Nature* 514(7523):445-449.
- 856

## 857 Supplementary Figures

858

859 **A)**

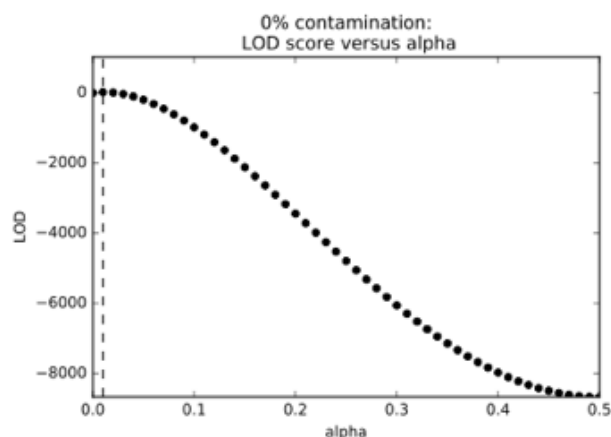

860

**B)**

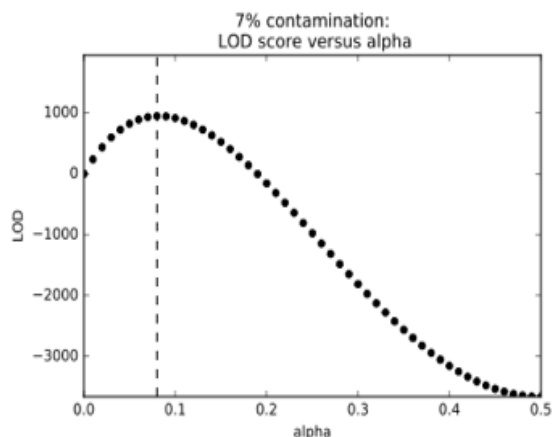

861

**C)**

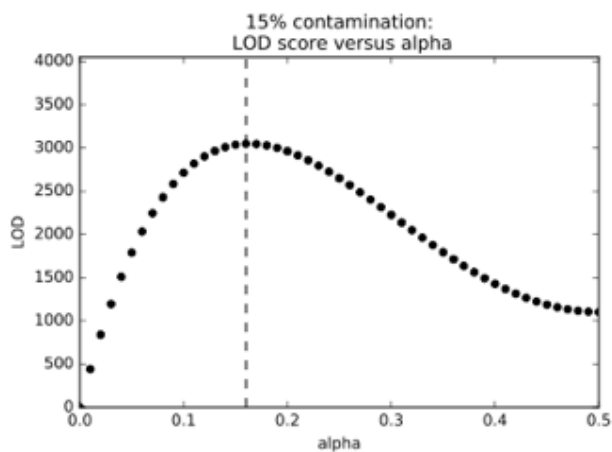

862

863 **Supplementary Figure 1. Distribution of LOD scores in simulated data.** The distribution of LOD  
864 scores is depicted for samples with **A)** 0%, **B)** 7%, and **C)** 15% simulated contamination. These data were  
865 generated as part of tests using 1000 Genomes CEU individuals as the sample and contaminant DNA  
866 and for the haplotype panel.

867

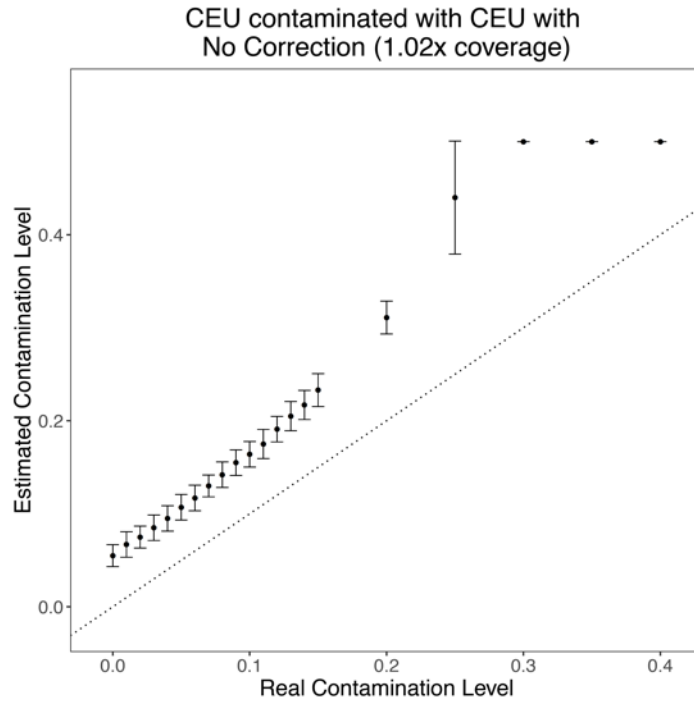

868

869 **Supplementary Figure 2. Contamination estimates when the individual, contaminant, and**  
870 **haplotype panel are all from the same population (CEU) with no correction.** The black dotted line is  
871  $y=x$ , which would correspond to a perfect estimation of the contamination. Error bars are  $1.96 \times$  standard  
872 error (95% confidence interval).

873

874

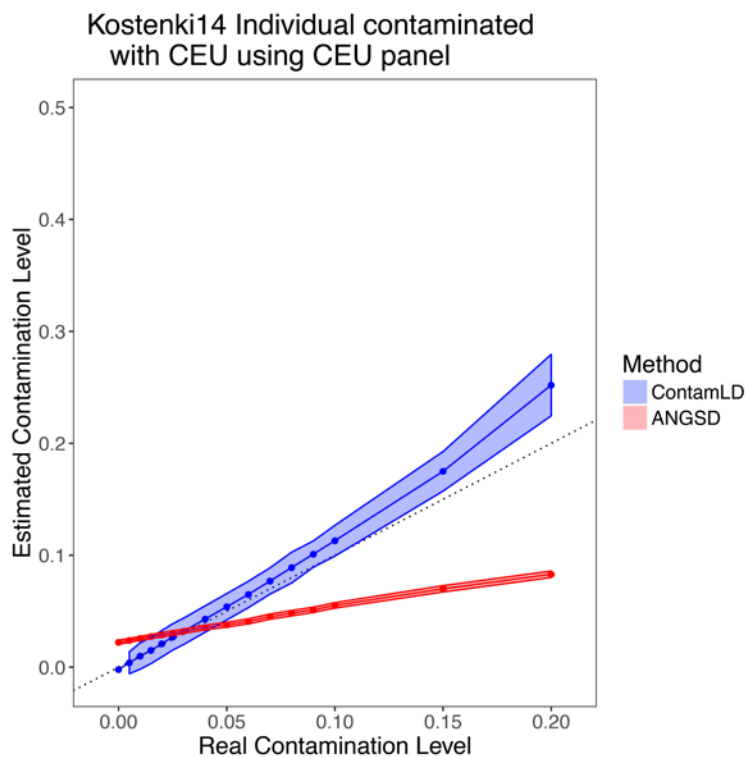

875

876 **Supplementary Figure 3. Contamination estimates for Upper Paleolithic European individual after**  
877 **damage restricted correction (option 1).** Kostenki14 (2.81x coverage) was contaminated with CEU and  
878 analyzed using a CEU panel with *ContamLD* using damage correction and *ANGSD* (12) (Method 1). The  
879 black dotted line is  $y=x$ , which would correspond to a perfect estimation of the contamination. Error  
880 shading is  $1.96 \times \text{standard error}$  (95% confidence interval).

881

882



Ancient Iberian (1.02x coverage) contaminated  
with ancestries different than their own

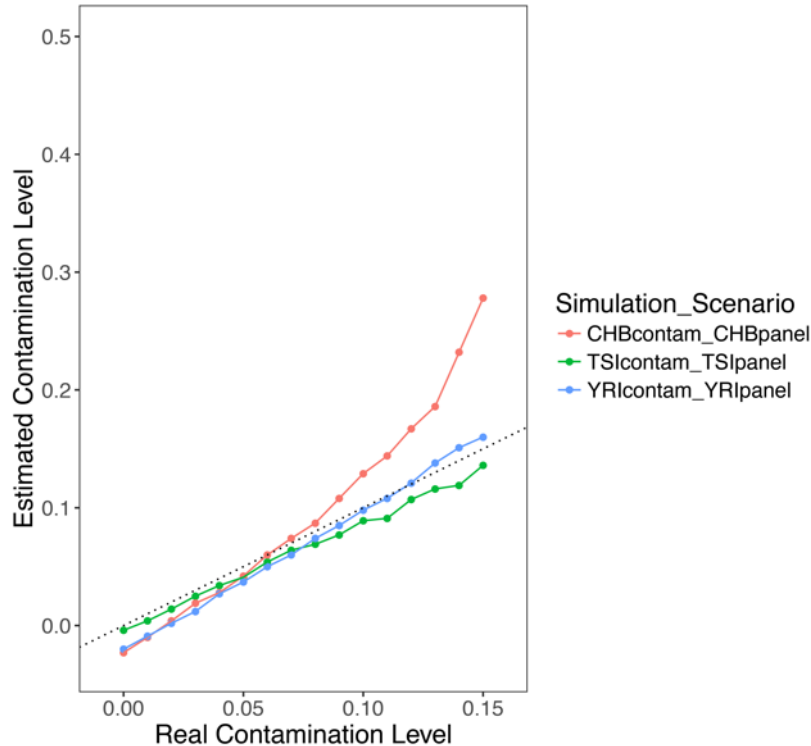

883

884 **Supplementary Figure 4. Contamination estimates with an ancient European as the sample and**

885 **ancestry matched contaminants and haplotype panels with damage restricted correction (option**

886 **1).** An ancient Iberian of 1.02x coverage (I3756) is analyzed in 3 different situations: 1) contaminated with

887 TSI and analyzed with a TSI panel, 2) contaminated with CHB and analyzed with a CHB panel, and 3)

888 contaminated with YRI and analyzed with a YRI panel. The black dotted line is  $y=x$ , which would

889 correspond to a perfect estimation of the contamination.

890

891

892

893

894

895

896

897 **A)**

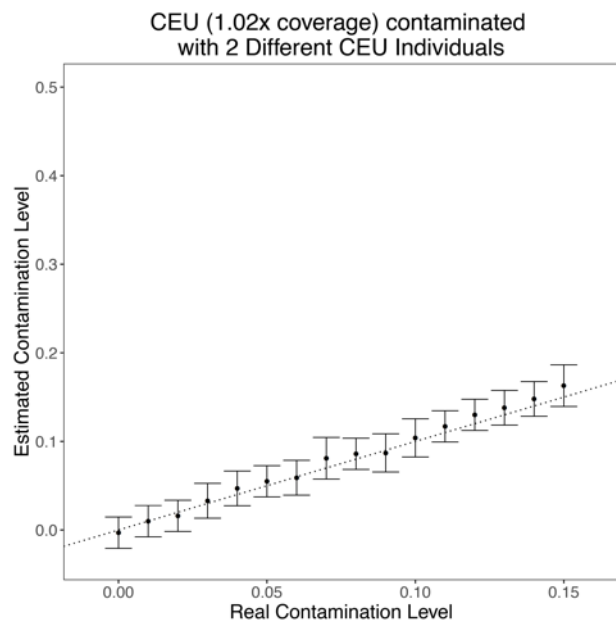

**B)**

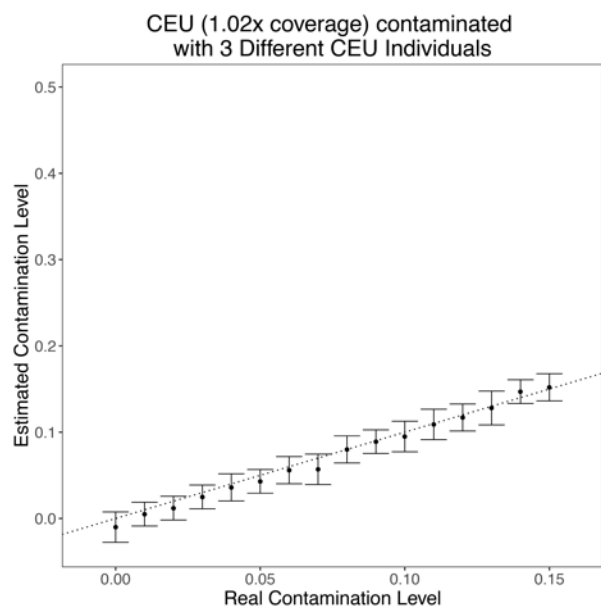

898

899 **Supplementary Figure 5. Contamination estimates with CEU as the sample and multiple CEU**

900 **individuals as contaminants analyzed with CEU haplotype panels with damage restricted**

901 **correction (option 1).** A CEU individual of 1.02x coverage (from the sequence distribution of the ancient

902 Iberian above) is contaminated with **A)** two CEU individuals or **B)** three CEU individuals. The black dotted

903 line is  $y=x$ , which would correspond to a perfect estimation of the contamination. Error bars are

904  $1.96 \times$  standard error (95% confidence interval).

905

906

907

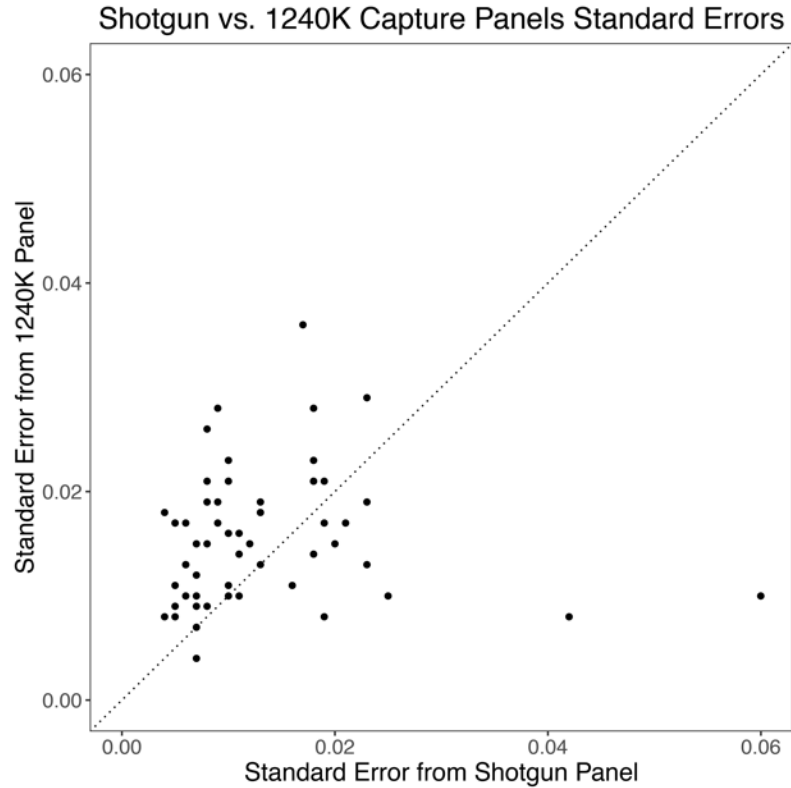

908

909 **Supplementary Figure 6. Contamination estimate standard errors of shotgun sequenced ancient**

910 **individuals comparing the 1240K panel to the shotgun panel.** Ancient shotgun sequenced individuals

911 of 0.1-0.5x coverage from Allentoft *et al.*, 2015 (26), Damgaard *et al.*, Nature 2018 (31), and Damgaard *et*

912 *al.*, Science 2018 (16) were analyzed with *ContamLD* damage restricted correction (option 1) using the

913 1240K SNP set and a shotgun panel created using all variants above 10% frequency in the 1000

914 Genomes dataset. This test shows that analyses with the shotgun panel generally have smaller error

915 bars relative to those done with the 1240K panel, though it is unclear why there are two outliers with high

916 standard errors on the shotgun panel and low standard errors on the 1240K panel. All estimates are in

917 Supplementary Online Table 1.

918

919

920

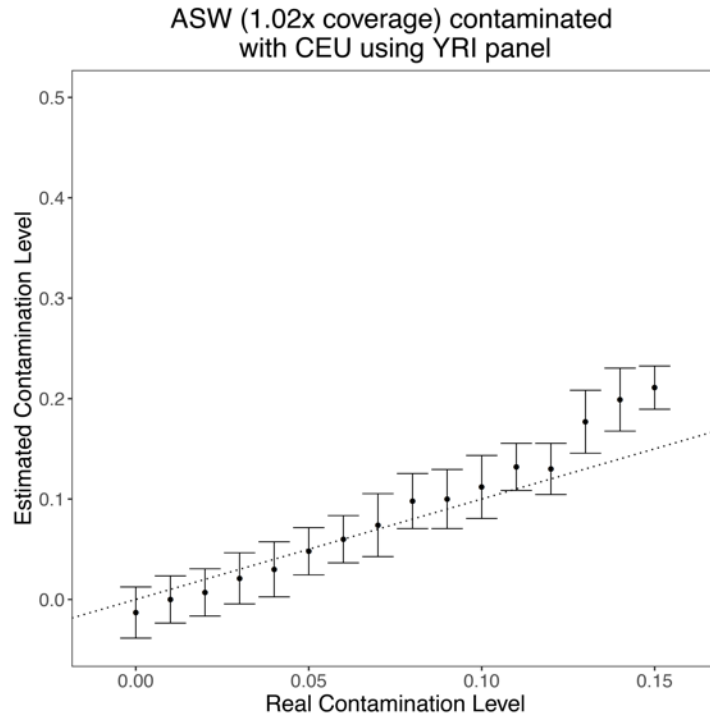

921

922 **Supplementary Figure 7. *ContamLD* estimates with an ASW (African-American) individual and YRI**

923 **panel using damage restricted correction (option 1).** The black dotted line is  $y=x$ , which would

924 correspond to a perfect estimation of the contamination. Error bars are  $1.96 \times$  standard error (95%

925 confidence interval).

926

927

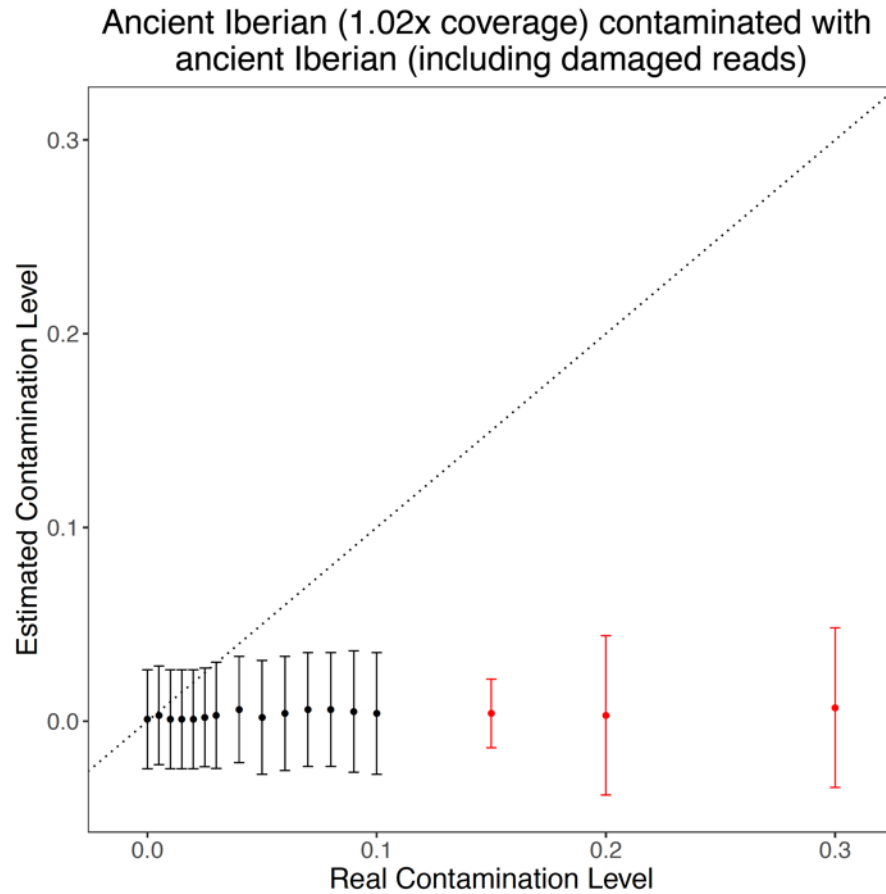

928

929 **Supplementary Figure 8. *ContamLD* estimates with an ancient Iberian (I3756) individual**

930 **contaminated with an ancient Iberian (I10895) including its damaged sequences analyzed with IBS**

931 **panel using damage restricted correction (option 1).** The damaged sequences were simulated as a

932 5% down-sampling of each respective contaminated BAM file. IBS are 1000 Genomes Project present-

933 day Iberians from Spain. The black dotted line is  $y=x$ , which would correspond to a perfect estimation of

934 the contamination. Error bars are  $1.96 \times$  standard error (95% confidence interval). Points in red are those

935 flagged with "Very\_High\_Contamination" by the software. See Supplementary Online Table 4 for all

936 values.
